# Supplementary material for: Magnetic Nanoclusters Increase the Sensitivity of Lateral Flow Immunoassays for Protein Detection: Application to Pneumolysin as a Biomarker for Streptococcus pneumoniae
Source: MDPI journal article supplement (doi:10.3390/nano12122044), 2022-06-14
Supplement: s1 [file s1]

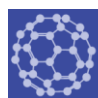

## Supplementary Materials

# Magnetic Nanoclusters Increase the Sensitivity of Lateral Flow Immunoassays for Protein Detection: Application to Pneumolysin as a Biomarker for *Streptococcus pneumoniae*

María Salvador <sup>1,2</sup>, José Luis Marqués-Fernández <sup>1</sup>, Alexander Bunge <sup>3</sup>, José Carlos Martínez-García <sup>1</sup>, Rodica Turcu <sup>3</sup>, Davide Peddis <sup>2,4</sup>, María del Mar García-Suárez <sup>5</sup>, María Dolores Cima-Cabal <sup>5</sup> and Montserrat Rivas <sup>1,\*</sup>

<sup>1</sup> Department of Physics & IUTA, University of Oviedo, Campus de Viesques, 33203 Gijón, Spain; salvadormaria@uniovi.es (M.S.); uo254204@uniovi.es (J.L.M.-F.); jcmg@uniovi.es (J.C.M.-G.)

<sup>2</sup> Institute of Structure of Matter—National Research Council (CNR), 00016 Monterotondo Scalo (RM), Rome, Italy; davide.peddis@unige.it

<sup>3</sup> National Institute for Research and Development of Isotopic and Molecular Technologies, 400293 Cluj-Napoca, Romania; alexander.bunge@itim-cj.ro (A.B.); rodica.turcu@itim-cj.ro (R.T.)

<sup>4</sup> Department of Chemistry and Industrial Chemistry, Università degli Studi di Genova, 16146 Genova, Italy

<sup>5</sup> Escuela Superior de Ingeniería y Tecnología (ESIT), Universidad Internacional de la Rioja, UNIR. Avenida de la Paz, 137, 26006 Logroño, Spain; mar.garcia.suarez@unir.net (M.d.M.G.-S.); dolores.cima@unir.net (M.D.C.-C.)

\* Correspondence: rivas@uniovi.es

**Table S1.** Samples tested in the magnetic concentration process with their initial PLY, the volume of RB added to obtain the diluted sample and their diluted concentration.

| Sample    | Initial PLY (ng) | Volume Added (μL) | Volume of the Diluted Sample (μL) | Concentration of the Diluted Sample (ng/mL) |
|-----------|------------------|-------------------|-----------------------------------|---------------------------------------------|
| Reference | 1.3              | 0                 | 100                               | 13.00                                       |
| 1         | 1.3              | 100               | 200                               | 6.50                                        |
| 2         | 1.3              | 200               | 300                               | 4.33                                        |
| 3         | 1.3              | 300               | 400                               | 3.25                                        |
| 4         | 1.3              | 400               | 500                               | 2.60                                        |
| 5         | 1.3              | 500               | 600                               | 2.17                                        |
| 6         | 1.3              | 600               | 700                               | 1.86                                        |
| 7         | 1.3              | 800               | 900                               | 1.44                                        |
| 8         | 1.3              | 900               | 1000                              | 1.30                                        |
| 9         | 1.3              | 1000              | 1100                              | 1.19                                        |
| 10        | 1.3              | 1250              | 1350                              | 0.96                                        |
| 11        | 1.3              | 1500              | 1650                              | 0.81                                        |
